# Supplementary material for: Favorable Humoral Response to Third Dose of BNT162b2 in Patients Undergoing Hemodialysis
Source: MDPI journal article supplement (doi:10.3390/jcm11082090), 2022-04-08
Supplement: s1 [file s1]

**SUPPLEMENTARY Table S1. Correlation between continuous parameters and anti-spike immunoglobulin G antibody levels 3 months or 4.5 months after the second dose of BNT162b2.**

|                           | Patients on HD (3M) |                 | Healthcare Workers (4.5M) |                 |
|---------------------------|---------------------|-----------------|---------------------------|-----------------|
|                           | <i>ρ</i>            | <i>p</i> -Value | <i>ρ</i>                  | <i>p</i> -Value |
| Age                       | −0.099              | 0.10            | −0.403                    | <0.001          |
| Dialysis vintage (months) | 0.144               | 0.02            | NA                        |                 |
| Body mass index           | −0.075              | 0.21            | 0.040                     | 0.64            |
| White blood cell count    | −0.001              | 0.98            | −0.029                    | 0.74            |
| Hemoglobin                | −0.065              | 0.28            | −0.076                    | 0.38            |
| Albumin                   | 0.105               | 0.08            | NA                        |                 |
| KT/V                      | 0.062               | 0.30            | NA                        |                 |

HD: hemodialysis, NA: not available

Spearman analysis was used

**Supplementary Table S2. The effect of sex on anti-spike immunoglobulin G antibody levels at the follow-up of the second dose.**

|                                                                        | <b>Male</b>            | <b>Female</b>          | <b><i>p</i>-Value</b> |
|------------------------------------------------------------------------|------------------------|------------------------|-----------------------|
| <b><u>(1) Measurement in October 2021</u></b>                          |                        |                        |                       |
| <b>Patients on hemodialysis (U/mL)</b>                                 | 220<br>(107–363)       | 200<br>(91–408)        | 0.97                  |
| <b>Healthcare workers (U/mL)</b>                                       | 464<br>(274–772)       | 649<br>(435–861)       | 0.02                  |
| <b><u>(2) Measurement 3 weeks after the third dose of BNT162b2</u></b> |                        |                        |                       |
| <b>Patients on hemodialysis (U/mL)</b>                                 | 19000<br>(11750–61000) | 19000<br>(12000–59000) | 0.85                  |
| <b>Healthcare workers (U/mL)</b>                                       | 20000<br>(16000–36500) | 21000<br>(14000–36750) | 0.68                  |
| <b><u>Increasing rate (2)/(1)</u></b>                                  |                        |                        |                       |
| <b>Patients on hemodialysis</b>                                        | 126<br>(68–218)        | 91<br>(56–209)         | 0.19                  |
| <b>Healthcare workers</b>                                              | 45<br>(26–93)          | 35<br>(25–56)          | 0.02                  |

Wilcoxon rank-sum tests were used.

Supplementary Table S3. The effect of diabetes on anti-spike immunoglobulin G antibody levels at the follow-up of the second dose.

|                                                                        | Diabetes               | Non-Diabetes           | <i>p</i> -Value |
|------------------------------------------------------------------------|------------------------|------------------------|-----------------|
| <b><u>(1) Measurement in October 2021</u></b>                          |                        |                        |                 |
| Patients on hemodialysis (U/mL)                                        | 220<br>(121–414)       | 202<br>(88–359)        | 0.14            |
| Healthcare workers (U/mL)                                              | 564<br>(237–818)       | 609<br>(433–880)       | 0.63            |
| <b><u>(2) Measurement 3 weeks after the third dose of BNT162b2</u></b> |                        |                        |                 |
| Patients on hemodialysis (U/mL)                                        | 21500<br>(12000–64000) | 18000<br>(11000–57000) | 0.20            |
| Healthcare workers (U/mL)                                              | 19000<br>(16000–22000) | 21000<br>(15000–36000) | 0.58            |
| <b><u>Increasing rate (2)/(1)</u></b>                                  |                        |                        |                 |
| Patients on hemodialysis                                               | 124<br>(67–209)        | 121<br>(57–218)        | 0.90            |
| Healthcare workers                                                     | 39<br>(23–76)          | 35<br>(24–62)          | 0.93            |

Wilcoxon rank-sum tests were used.

**Supplementary Table S4. Effect of glucocorticoids on anti-spike immunoglobulin G antibody levels at the follow-up of the second dose in patients undergoing hemodialysis.**

|                                                                        | <b>Glucocorticoid Users</b> | <b>Non-Users</b>       | <b><i>p</i>-Value</b> |
|------------------------------------------------------------------------|-----------------------------|------------------------|-----------------------|
| <b><u>(1) Measurement in October 2021</u></b>                          |                             |                        |                       |
| <b>Patients on hemodialysis (U/mL)</b>                                 | 135<br>(61–187)             | 220<br>(104–393)       | 0.10                  |
| <b><u>(2) Measurement 3 weeks after the third dose of BNT162b2</u></b> |                             |                        |                       |
| <b>Patients on hemodialysis (U/mL)</b>                                 | 23000<br>(13000–87250)      | 19000<br>(12000–61000) | 0.63                  |
| <b><u>Increasing rate (2)/(1)</u></b>                                  |                             |                        |                       |
| <b>Patients on hemodialysis</b>                                        | 163<br>(81–1419)            | 122<br>(59–211)        | 0.22                  |

Wilcoxon rank-sum tests were used.
